# Supplementary material for: In situ synthesis of fluorescent polydopamine polymer dots based on Fenton reaction for a multi-sensing platform
Source: Royal Society of Chemistry journal article supplement (doi:10.1039/d1tb00764e), 2021-01-01
Supplement: d1tb00764e1.pdf [file d1tb00764e1.pdf]

*Supporting information*

**In situ synthesis of fluorescent polydopamine polymer dots based on Fenton reaction for multi-sensing platform**

Quan Li<sup>a</sup>, Taoyi Zhang<sup>b</sup>, Jing Chen<sup>b</sup>, Wenxi Ji<sup>b</sup>, Yun Wei<sup>a\*</sup>

<sup>a</sup> State Key Laboratory of Chemical Resource Engineering, Beijing University of Chemical Technology, 15 3<sup>rd</sup> North East Road, Chaoyang District, Beijing 100029, China.

<sup>b</sup> Sinopec Beijing Research Institute of Chemical Industry, 14 North Third Ring Road East, Chaoyang District, Beijing 100014, China.

\*Corresponding authors. Yun Wei, E-mail: weiyun@mail.buct.edu.cn

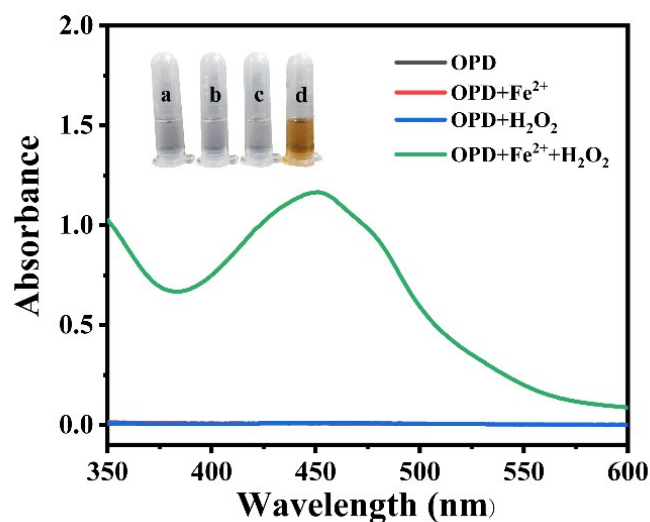

**Fig. S1** Absorption spectra of (a) OPD solution, (b) OPD-Fe<sup>2+</sup> solution, (c) OPD-H<sub>2</sub>O<sub>2</sub> solution, (d) OPD-Fe<sup>2+</sup>-H<sub>2</sub>O<sub>2</sub> solution (insert: the corresponding photograph under natural light). The concentrations of Fe<sup>2+</sup>, OPD, and H<sub>2</sub>O<sub>2</sub> are 100 μM, 200 μM, and 2 mM, respectively, and pH 4.0.

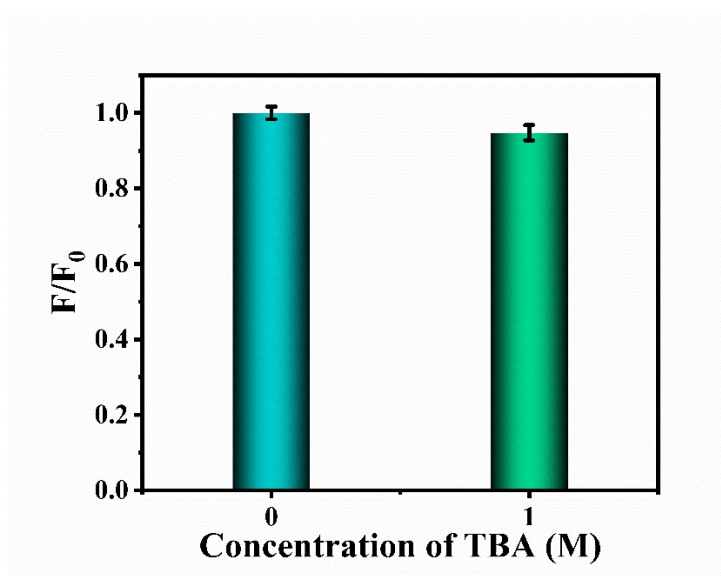

**Fig. S2** The fluorescence response of the obtained PDA-PDs with TBA, where  $F_0$  and  $F$  are fluorescence intensity of the PDA-PDs in the absence and presence of TBA, respectively.

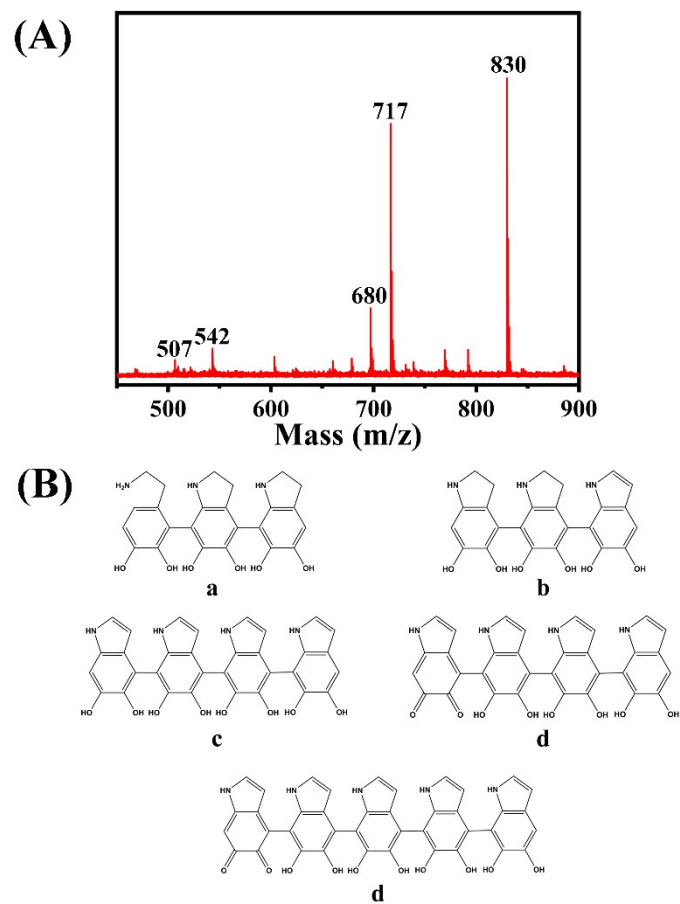

**Fig. S3** (A) MALDI-TOF mass spectrometry of the as-synthesized PDA-PDs. (B) Possible chemical structures of the fragments of PDA-PDs.

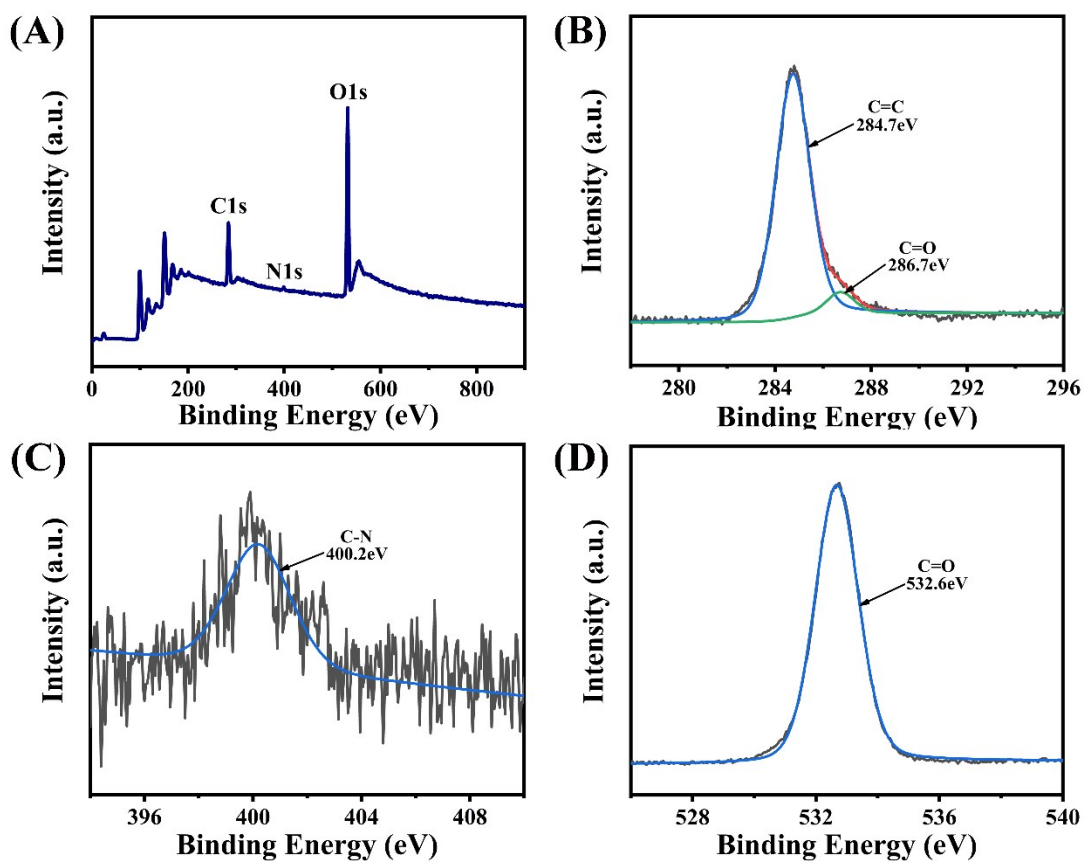

**Fig. S4** (A) XPS spectra of the PDA-PDs. High resolution (B) C1s, (C) N1s, and (D) O1s peaks of the PDA-PDs.

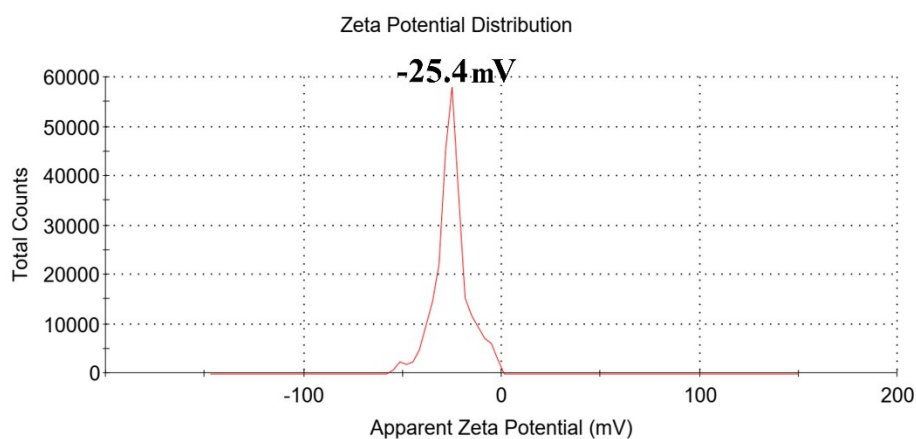

**Fig. S5** The zeta potential of the PDA-PDs.

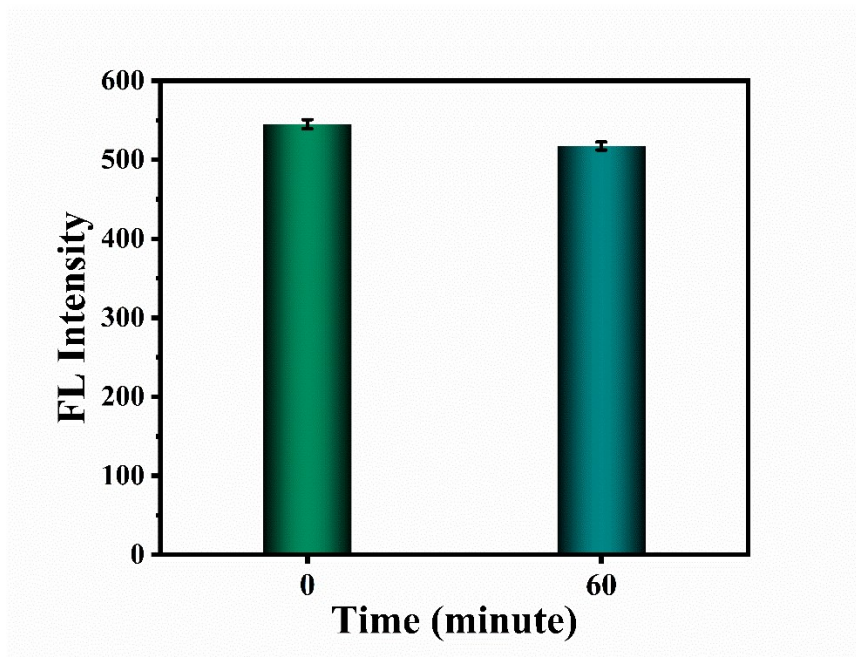

**Fig. S6** The fluorescence intensity of the PDA-PDs under 365 nm excitation for 60 min.

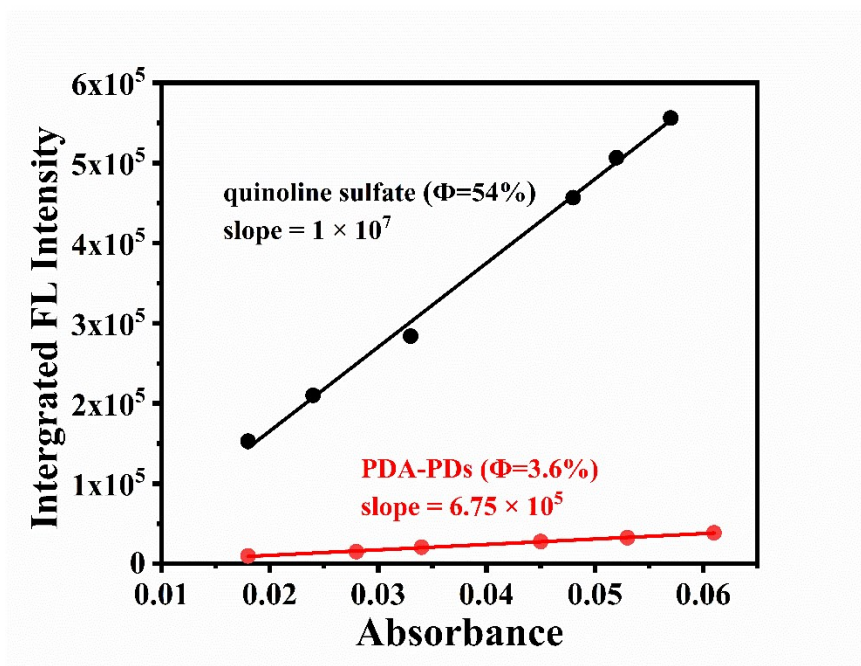

**Fig. S7** The relationship of the integrated fluorescence intensity with absorbance at 380 nm for quinoline sulfate and fluorescent PDA-PDs.

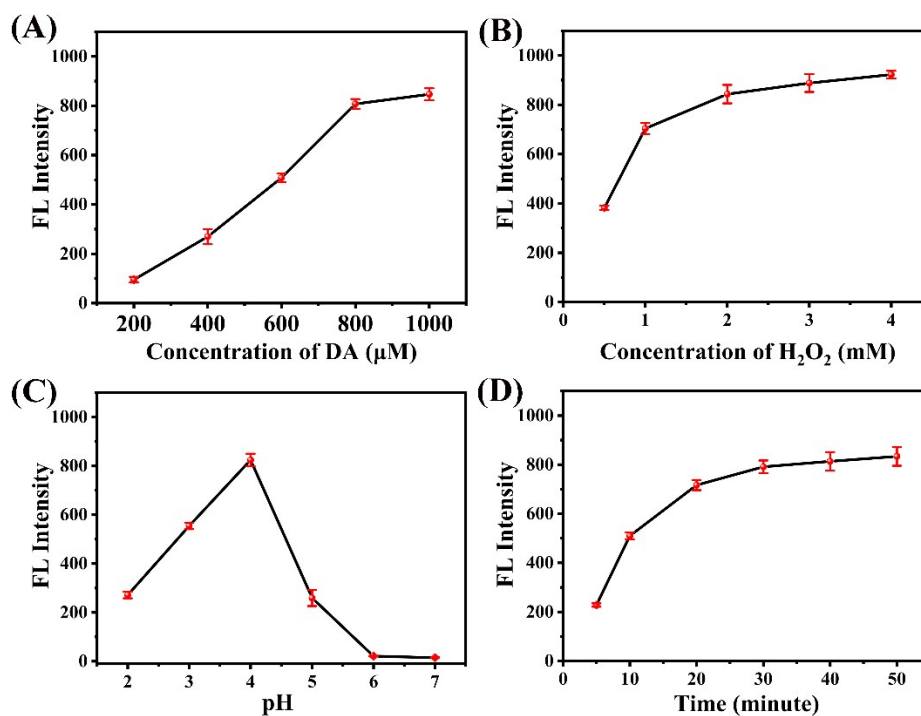

**Fig. S8** Effects of (A) DA concentration, (B) H<sub>2</sub>O<sub>2</sub> concentration, (C) pH, and (D) incubation time on the detection of Fe<sup>2+</sup>.

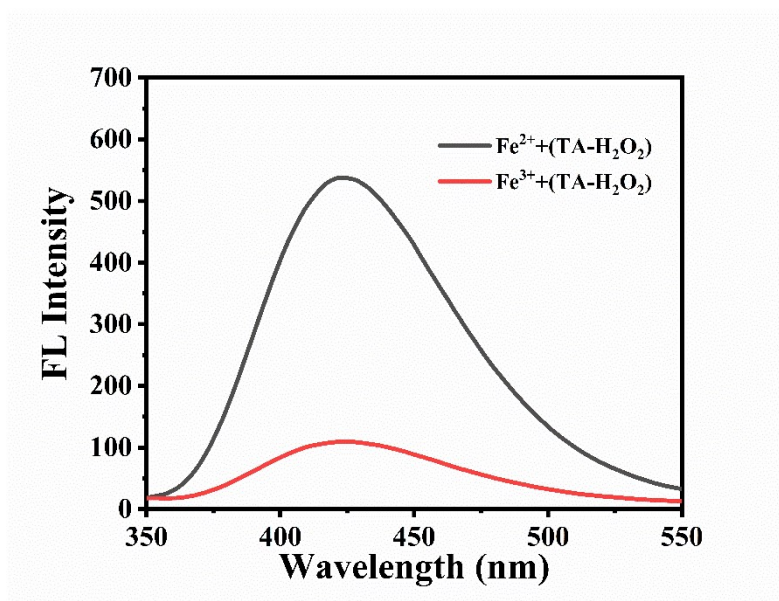

**Fig. S9** The fluorescence spectra of the TA-H<sub>2</sub>O<sub>2</sub> system catalyzed by Fe<sup>2+</sup> and Fe<sup>3+</sup>. TA concentration: 1 mM; H<sub>2</sub>O<sub>2</sub> concentration: 2 mM; Fe<sup>2+</sup> concentration: 50 μM; Fe<sup>3+</sup> concentration: 50 μM; pH: 4.0; Reaction time: 30 min.

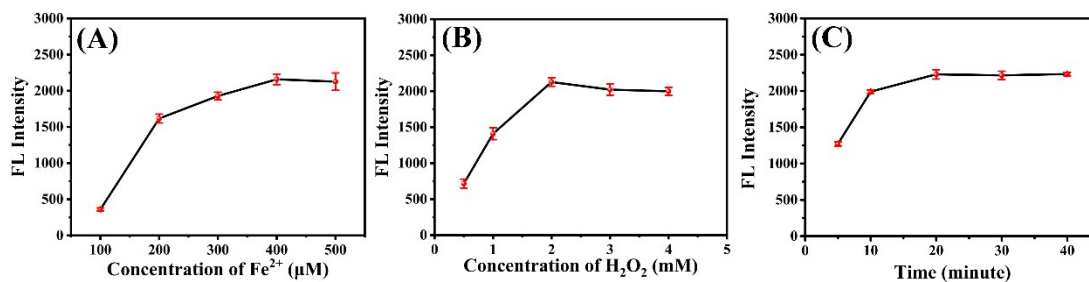

**Fig. S10** Effects of (A) Fe<sup>2+</sup> concentration, (B) H<sub>2</sub>O<sub>2</sub> concentration, and (C) incubation time on the detection of DA at pH 4.0.

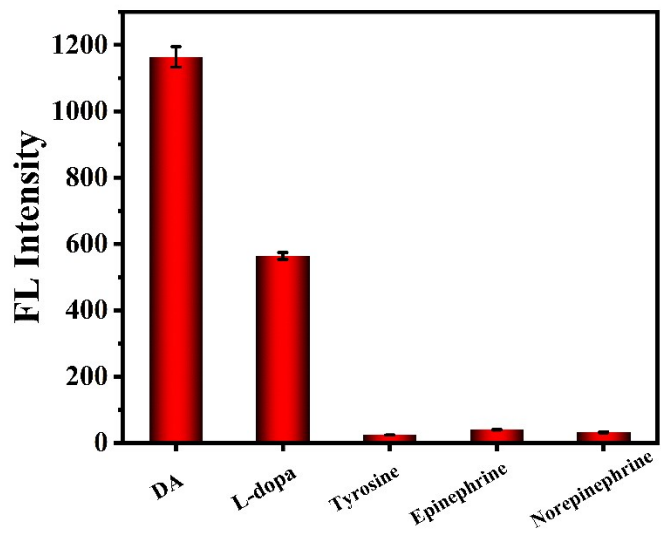

**Fig. S11** The fluorescence intensities of Fe<sup>2+</sup>-H<sub>2</sub>O<sub>2</sub> system by adding different substrates with similar molecular structure to DA.

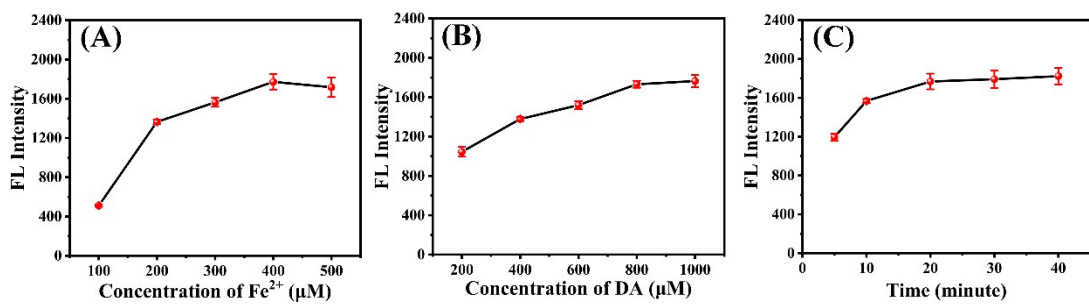

**Fig. S12** Effects of (A) Fe<sup>2+</sup> concentration, (B) DA concentration, and (C) incubation time on the detection of H<sub>2</sub>O<sub>2</sub> at pH 4.0.

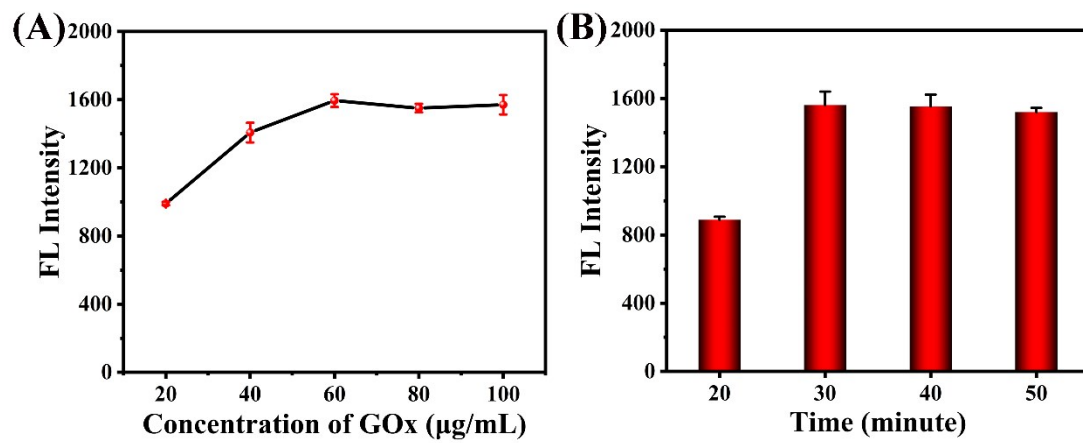

**Fig. S13** Effects of (A) GOx concentration, (B) incubation time on the detection of glucose at 37°C.



**Table S1** Comparison of different analytical methods for Fe<sup>2+</sup> sensing.

| Methods          | Sensing Probe            | LOD ( $\mu\text{M}$ ) | Reference |
|------------------|--------------------------|-----------------------|-----------|
| Electrochemistry | SMS-1 modified SPE       | 0.54                  | 1         |
| Colorimetry      | Chelate-type Schiff base | 0.19                  | 2         |
| Colorimetry      | Agar-stabilized AgNPs    | 0.54                  | 3         |
| Colorimetry      | Triazole-Azo dye         | 0.11                  | 4         |
| Fluorometry      | Carbon dots              | 0.051                 | 5         |
| Fluorometry      | MPA-CdZnTe QDs           | 0.2                   | 6         |
| Fluorometry      | PDA-PDs                  | 0.09                  | This work |

**Table S2** Comparison of different analytical methods for DA sensing.

| Methods          | Sensing Probe                         | LOD ( $\mu\text{M}$ ) | Reference |
|------------------|---------------------------------------|-----------------------|-----------|
| Electrochemistry | 3D pGO-GNP-ITO                        | 6                     | 7         |
| Electrochemistry | Pt-Au nanoparticles                   | 0.075                 | 8         |
| Colorimetry      | CoFe <sub>2</sub> O <sub>4</sub> /CoS | 0.58                  | 9         |
| Colorimetry      | Pt/CoFe <sub>2</sub> O <sub>4</sub>   | 0.42                  | 10        |
| Fluorometry      | F-CuInS <sub>2</sub>                  | 0.2                   | 11        |
| Fluorometry      | GQDs                                  | 0.09                  | 12        |
| Fluorometry      | PDA-PDs                               | 0.07                  | This work |

**Table S3** Comparison of different analytical methods for glucose sensing.

| Methods        | Sensing Probe                               | LOD ( $\mu\text{M}$ ) | Reference |
|----------------|---------------------------------------------|-----------------------|-----------|
| Chromatography | 3-OMG                                       | 0.39                  | 13        |
| Colorimetry    | Fe-doped CeO <sub>2</sub> NRs               | 3.41                  | 14        |
| Colorimetry    | H <sub>2</sub> TCPP-Co(OH) <sub>2</sub> -GO | 9.5                   | 15        |
| Fluorometry    | C-dots/AgNPs                                | 1.39                  | 16        |
| Fluorometry    | Nanoceria                                   | 8.9                   | 17        |
| Fluorometry    | MnO <sub>2</sub> -UCNPs                     | 3.7                   | 18        |
| Fluorometry    | PDA-PDs                                     | 1.61                  | This work |

**Table S4** Determination of Fe<sup>2+</sup> in serum samples (n = 3).

| Samples  | Added ( $\mu\text{M}$ ) | Measured ( $\mu\text{M}$ ) | Recovery (%) | RSD (%) |
|----------|-------------------------|----------------------------|--------------|---------|
| <b>1</b> | 0.00                    | ND                         | /            | /       |
|          | 2.00                    | 1.85                       | 92.5         | 3.79    |
|          | 4.00                    | 4.13                       | 103.3        | 2.86    |
| <b>2</b> | 0.00                    | ND                         | /            | /       |
|          | 2.00                    | 2.12                       | 106.0        | 3.67    |
|          | 4.00                    | 3.73                       | 93.3         | 4.63    |

The final serum samples were diluted 100-fold for detection.

**Table S5** Determination of dopamine in serum samples (n = 3).

| Samples  | Added ( $\mu\text{M}$ ) | Measured ( $\mu\text{M}$ ) | Recovery (%) | RSD (%) |
|----------|-------------------------|----------------------------|--------------|---------|
| <b>1</b> | 0.00                    | ND                         | /            | /       |
|          | 5.00                    | 5.59                       | 111.8        | 4.00    |
|          | 10.00                   | 11.60                      | 116.0        | 2.71    |
| <b>2</b> | 0.00                    | ND                         | /            | /       |
|          | 5.00                    | 5.24                       | 104.8        | 3.08    |
|          | 10.00                   | 9.51                       | 95.1         | 4.63    |

The final serum samples were diluted 100-fold for detection.

**Table S6** Determination of glucose in serum samples (n = 3).

| Samples  | Added ( $\mu\text{M}$ ) | Measured ( $\mu\text{M}$ ) | Recovery (%) | RSD (%) |
|----------|-------------------------|----------------------------|--------------|---------|
| <b>1</b> | 0.00                    | 48.52                      | /            | /       |
|          | 10.00                   | 58.99                      | 100.8        | 4.36    |
|          | 20.00                   | 67.02                      | 97.8         | 2.43    |
| <b>2</b> | 0.00                    | 44.68                      | /            | /       |
|          | 10.00                   | 53.2                       | 97.3         | 3.14    |
|          | 20.00                   | 68.73                      | 106.3        | 2.57    |

The final serum samples were diluted 100-fold for detection.

## References

- [1] S. Rana, S. K. Mittal, N. Kaur, and C. E. Banks. *Sensor. Actuat B: Chem.*, 2017, **249**, 467-477.
- [2] G. R. You, G. J. Park, S. A. Lee, K. Y. Ryu, C. Kim. *Sensor. Actuat B: Chem.*, 2015, **215**, 188-195.

- [3] S. Basiri, A. Mehdinia, A. Jabbari. *Colloids Surf. A.*, 2018, **545**, 138-146.
- [4] G. Singh, P. Satija, A. Singh, Diksha, Pawan, Suman, Sushma, Mohit, and S. Soni. *Mater. Chem. Phys.*, 2020, **249**, 123005.
- [5] S. Wei, L. Tan, X. Yin, R. Wang, X. Shan, Q. Chen, T. Li, X. Zhang, C. Jiang, and G. Sun. *Analyst* 2020, **145**, 2357-2366.
- [6] J. Qian, X. Lu, C. Wang, H. Cui, K. An, L. Long, N. Hao, and K. Wang. *Sensor. Actuat B: Chem.*, 2020, **322**, 128636.
- [7] S. S. Choo, E. S. Kang, I. Song, D. Lee, J. W. Choi, and T. H. Kim. *Sensors* 2017, **17**, 861.
- [8] X. Hui, X. Xuan, J. Kim, and J. Y. Park. *Electrochim Acta* 2019, **328**, 135066.
- [9] Z. Yang, Y. Zhu, M. Chi, C. Wang, Y. Wei, and X. Lu. *J. Colloid Interf Sci.*, 2018, **511**, 383-391.
- [10] F. He, W. Li, F. Zhao, X. Zhu, Q. Liu, Z. Liu, X. Zhang, and X. Zhang. *Microchem. J.*, 2020, **158**, 105264.
- [11] M. Yu, Y. Lu, Z. Tan. *Talanta* 2017, **168**, 16-22.
- [12] J. Zhao, L. Zhao, C. Lan, and S. Zhao. *Sensor. Actuat B: Chem.*, 2016, **223**, 246-251.
- [13] Z. Ling, P. Xu, Z. Zhong, F. Wang, N. Shu, J. Zhang, X. Tang, L. Liu, and X. Liu. *Biomed. Chromatogr.*, 2016, **30**, 601-605.
- [14] D. Jampaiah, T. Srinivasa Reddy, A. E. Kandjani, P. R. Selvakannan, Y. M. Sabri, V. E. Coyle, R. Shukla, and S. K. Bhargava. *J. Mater. Chem. B.*, 2016, **4**, 3874-3885.
- [15] X. Zhao, K. Wu, H. Lyu, X. Zhang, Z. Liu, G. Fan, X. Zhang, X. Zhu, and Q. Liu. *Analyst* 2019, **144**, 5284-5291.
- [16] J. L. Ma, B. C. Yin, X. Wu, and B. C. Ye. *Anal. Chem.*, 2017, **89**, 1323-1328.
- [17] B. Liu, Z. Sun, P. J. Huang, and J. Liu. *J. Am. Chem. Soc.*, 2015, **137**, 1290-1295.
- [18] J. Yuan, Y. Cen, X. J. Kong, S. Wu, C. L. Liu, R. Q. Yu, X. Chu. *ACS Appl. Mater. Interfaces*, 2015, **7**, 10548-10555.
